# Supplementary material for: Synthesis of chiral mono(N-heterocyclic carbene) palladium and gold complexes with a 1,1'-biphenyl scaffold and their applications in catalysis
Source: publisher site journal article supplement (doi:10.3762/bjoc.7.64), 2011-05-04
Supplement: Additional file 2 [file 1860-5397-7-64-S2.pdf]

## Supporting Information

for

### **Synthesis of chiral mono(N-heterocyclic carbene) palladium and gold complexes with a 1,1'-biphenyl scaffold and their applications in catalysis**

Lian-jun Liu<sup>1</sup>, Feijun Wang<sup>1</sup>, Wenfeng Wang<sup>1</sup>, Mei-xin Zhao<sup>1</sup> and Min Shi\*<sup>1,2</sup>

Address: <sup>1</sup>Key Laboratory for Advanced Materials and Institute of Fine Chemicals, School of Chemistry & Molecular Engineering, East China University of Science and Technology, 130 MeiLong Road, Shanghai 200237, People's Republic of China and <sup>2</sup>State Key Laboratory of Organometallic Chemistry, Shanghai Institute of Organic Chemistry, Chinese Academy of Sciences, 354 Fenglin Road, Shanghai 200032, People's Republic of China, Fax: 86-21-64166128

Email: Min Shi\* - Mshi@mail.sioc.ac.cn

\*Corresponding author

#### **Crystal structure data for NHC–Pd(II) complex 7a**

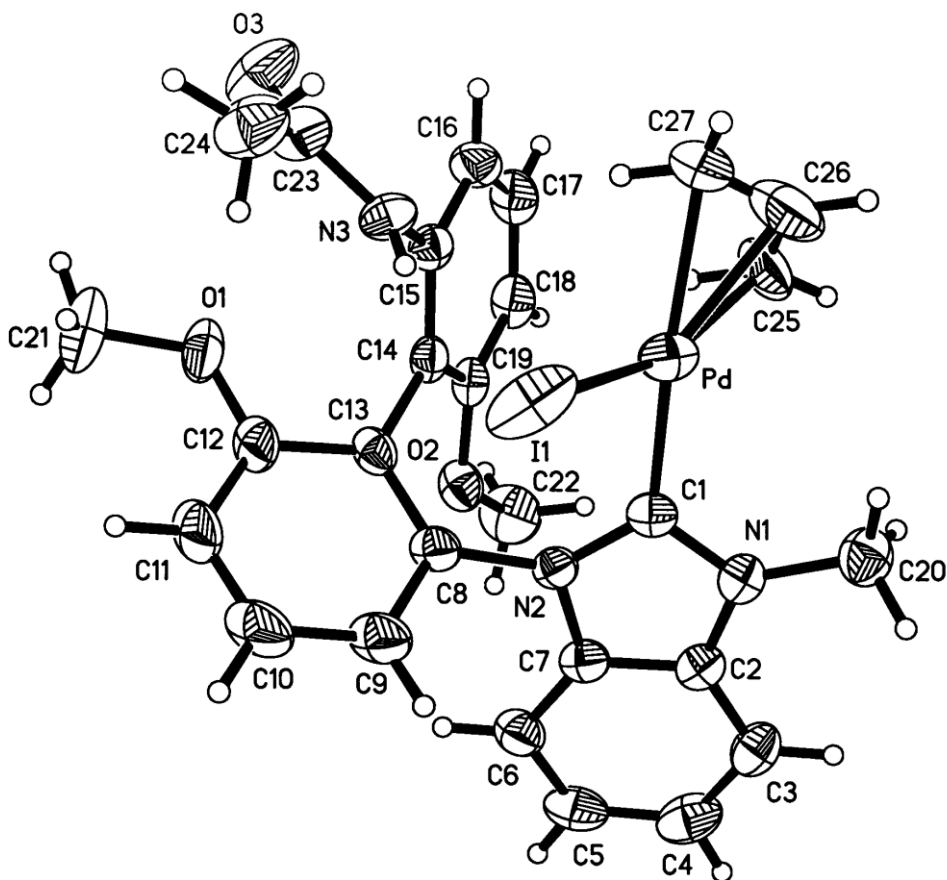

The crystal data of **7a** have been deposited in CCDC with number 754776. Empirical Formula:  $C_{27}H_{28}IN_3O_3Pd$ ; Formula Weight: 675.82; Crystal Color, Habit: colorless, prismatic; Crystal Dimensions: 0.309 x 0.250 x 0.191 mm; Crystal System: Monoclinic; Lattice Type: Primitive; Lattice Parameters:  $a = 9.8872(8)\text{\AA}$ ,  $b = 16.8643(14)\text{\AA}$ ,  $c = 16.8744(15)\text{\AA}$ ,  $\alpha = 90^\circ$ ,  $\beta = 100.713(2)^\circ$ ,  $\gamma = 90^\circ$ ,  $V = 2764.6(4)\text{\AA}^3$ ; Space group:  $P2(1)/c$ ;  $Z = 4$ ;  $D_{calc} = 1.624\text{ g/cm}^3$ ;  $F_{000} = 1336$ ; Diffractometer: Rigaku AFC7R; Residuals: R;  $R_w = 0.0491, 0.1007$ .

Table 1. Crystal data and structure refinement for cd29547.

|                                   |                                                                                                                           |
|-----------------------------------|---------------------------------------------------------------------------------------------------------------------------|
| Identification code               | cd29547                                                                                                                   |
| Empirical formula                 | C <sub>27</sub> H <sub>28</sub> I N <sub>3</sub> O <sub>3</sub> Pd                                                        |
| Formula weight                    | 675.82                                                                                                                    |
| Temperature                       | 293(2) K                                                                                                                  |
| Wavelength                        | 0.71073 Å                                                                                                                 |
| Crystal system, space group       | Monoclinic, P2(1)/c                                                                                                       |
| Unit cell dimensions              | a = 9.8872(8) Å    alpha = 90 deg.<br>b = 16.8643(14) Å    beta = 100.713(2) deg.<br>c = 16.8744(15) Å    gamma = 90 deg. |
| Volume                            | 2764.6(4) Å <sup>3</sup>                                                                                                  |
| Z, Calculated density             | 4, 1.624 Mg/m <sup>3</sup>                                                                                                |
| Absorption coefficient            | 1.819 mm <sup>-1</sup>                                                                                                    |
| F(000)                            | 1336                                                                                                                      |
| Crystal size                      | 0.309 x 0.250 x 0.191 mm                                                                                                  |
| Theta range for data collection   | 1.72 to 25.49 deg.                                                                                                        |
| Limiting indices                  | -11<=h<=11, -20<=k<=14, -18<=l<=20                                                                                        |
| Reflections collected / unique    | 14252 / 5145 [R(int) = 0.0528]                                                                                            |
| Completeness to theta = 25.49     | 100.0 %                                                                                                                   |
| Absorption correction             | Empirical                                                                                                                 |
| Max. and min. transmission        | 1.00000 and 0.81653                                                                                                       |
| Refinement method                 | Full-matrix least-squares on F <sup>2</sup>                                                                               |
| Data / restraints / parameters    | 5145 / 1 / 324                                                                                                            |
| Goodness-of-fit on F <sup>2</sup> | 0.936                                                                                                                     |
| Final R indices [I>2sigma(I)]     | R1 = 0.0491, wR2 = 0.1007                                                                                                 |
| R indices (all data)              | R1 = 0.0780, wR2 = 0.1109                                                                                                 |
| Largest diff. peak and hole       | 1.093 and -0.564 e.Å <sup>-3</sup>                                                                                        |

Table 2. Atomic coordinates ( $\times 10^4$ ) and equivalent isotropic displacement parameters ( $\text{\AA}^2 \times 10^3$ ) for cd29547.  $U(\text{eq})$  is defined as one third of the trace of the orthogonalized  $U_{ij}$  tensor.

|       | x        | y        | z       | $U(\text{eq})$ |
|-------|----------|----------|---------|----------------|
| Pd    | 799(1)   | 1637(1)  | 8506(1) | 61(1)          |
| I(1)  | 3189(1)  | 2293(1)  | 8413(1) | 101(1)         |
| N(1)  | -1445(4) | 2096(2)  | 7081(3) | 51(1)          |
| N(2)  | 198(4)   | 1485(2)  | 6653(3) | 45(1)          |
| N(3)  | 3215(5)  | 85(3)    | 8479(3) | 56(1)          |
| O(1)  | 3786(4)  | -485(3)  | 6955(3) | 77(1)          |
| O(2)  | -414(3)  | -206(2)  | 6213(2) | 59(1)          |
| O(3)  | 4424(5)  | -1028(3) | 8889(3) | 109(2)         |
| C(1)  | -180(5)  | 1764(3)  | 7330(3) | 47(1)          |
| C(2)  | -1864(5) | 2021(3)  | 6261(3) | 49(1)          |
| C(3)  | -3056(6) | 2273(3)  | 5742(4) | 65(2)          |
| C(4)  | -3161(7) | 2084(4)  | 4938(5) | 80(2)          |
| C(5)  | -2141(7) | 1654(4)  | 4659(4) | 75(2)          |
| C(6)  | -957(6)  | 1420(3)  | 5162(4) | 63(2)          |
| C(7)  | -833(5)  | 1628(3)  | 5978(3) | 50(1)          |
| C(8)  | 1526(5)  | 1204(3)  | 6548(3) | 53(1)          |
| C(9)  | 2240(6)  | 1690(4)  | 6117(4) | 75(2)          |
| C(10) | 3498(7)  | 1449(5)  | 5965(4) | 95(2)          |
| C(11) | 4052(6)  | 743(5)   | 6237(4) | 84(2)          |
| C(12) | 3336(5)  | 249(4)   | 6676(4) | 63(2)          |
| C(13) | 2065(5)  | 475(3)   | 6850(3) | 49(1)          |
| C(14) | 1342(5)  | -67(3)   | 7336(3) | 46(1)          |
| C(15) | 1953(5)  | -270(3)  | 8119(3) | 49(1)          |
| C(16) | 1314(6)  | -801(3)  | 8568(4) | 61(2)          |
| C(17) | 70(6)    | -1125(3) | 8212(4) | 70(2)          |
| C(18) | -569(6)  | -939(3)  | 7440(4) | 62(2)          |
| C(19) | 88(5)    | -409(3)  | 6997(3) | 50(1)          |
| C(20) | -2246(6) | 2498(4)  | 7603(4) | 74(2)          |
| C(21) | 5108(7)  | -745(5)  | 6863(5) | 119(3)         |
| C(22) | -1763(6) | -434(5)  | 5853(4) | 95(2)          |
| C(23) | 4380(6)  | -314(4)  | 8804(4) | 74(2)          |
| C(24) | 5624(6)  | 211(4)   | 9028(4) | 96(2)          |
| C(25) | -788(9)  | 989(5)   | 8946(5) | 100(3)         |
| C(26) | 66(16)   | 1352(7)  | 9580(7) | 158(5)         |
| C(27) | 1377(11) | 1256(7)  | 9750(5) | 146(5)         |

Table 3. Bond lengths [Å] and angles [deg] for cd29547.

---

|              |           |
|--------------|-----------|
| Pd-C(1)      | 2.050(5)  |
| Pd-C(26)     | 2.128(9)  |
| Pd-C(25)     | 2.154(7)  |
| Pd-C(27)     | 2.168(8)  |
| Pd-I(1)      | 2.6404(7) |
| N(1)-C(1)    | 1.364(6)  |
| N(1)-C(2)    | 1.373(6)  |
| N(1)-C(20)   | 1.456(7)  |
| N(2)-C(1)    | 1.351(6)  |
| N(2)-C(7)    | 1.400(6)  |
| N(2)-C(8)    | 1.437(6)  |
| N(3)-C(23)   | 1.358(7)  |
| N(3)-C(15)   | 1.415(6)  |
| N(3)-H(3A)   | 0.819(19) |
| O(1)-C(12)   | 1.369(7)  |
| O(1)-C(21)   | 1.415(7)  |
| O(2)-C(19)   | 1.368(6)  |
| O(2)-C(22)   | 1.412(6)  |
| O(3)-C(23)   | 1.213(7)  |
| C(2)-C(7)    | 1.374(7)  |
| C(2)-C(3)    | 1.397(7)  |
| C(3)-C(4)    | 1.380(8)  |
| C(3)-H(3)    | 0.9300    |
| C(4)-C(5)    | 1.393(9)  |
| C(4)-H(4)    | 0.9300    |
| C(5)-C(6)    | 1.370(8)  |
| C(5)-H(5)    | 0.9300    |
| C(6)-C(7)    | 1.404(7)  |
| C(6)-H(6)    | 0.9300    |
| C(8)-C(9)    | 1.375(7)  |
| C(8)-C(13)   | 1.398(7)  |
| C(9)-C(10)   | 1.377(9)  |
| C(9)-H(9)    | 0.9300    |
| C(10)-C(11)  | 1.354(9)  |
| C(10)-H(10)  | 0.9300    |
| C(11)-C(12)  | 1.392(8)  |
| C(11)-H(11)  | 0.9300    |
| C(12)-C(13)  | 1.396(7)  |
| C(13)-C(14)  | 1.495(7)  |
| C(14)-C(19)  | 1.390(7)  |
| C(14)-C(15)  | 1.390(7)  |
| C(15)-C(16)  | 1.399(7)  |
| C(16)-C(17)  | 1.377(8)  |
| C(16)-H(16)  | 0.9300    |
| C(17)-C(18)  | 1.374(8)  |
| C(17)-H(17)  | 0.9300    |
| C(18)-C(19)  | 1.399(7)  |
| C(18)-H(18)  | 0.9300    |
| C(20)-H(20A) | 0.9600    |
| C(20)-H(20B) | 0.9600    |
| C(20)-H(20C) | 0.9600    |
| C(21)-H(21A) | 0.9600    |
| C(21)-H(21B) | 0.9600    |
| C(21)-H(21C) | 0.9600    |
| C(22)-H(22A) | 0.9600    |
| C(22)-H(22B) | 0.9600    |
| C(22)-H(22C) | 0.9600    |
| C(23)-C(24)  | 1.506(8)  |
| C(24)-H(24A) | 0.9600    |
| C(24)-H(24B) | 0.9600    |
| C(24)-H(24C) | 0.9600    |
| C(25)-C(26)  | 1.377(14) |
| C(25)-H(25A) | 0.9300    |
| C(25)-H(25B) | 0.9300    |
| C(26)-C(27)  | 1.285(14) |
| C(26)-H(26)  | 0.9300    |
| C(27)-H(27A) | 0.9300    |
| C(27)-H(27B) | 0.9300    |

|                   |           |
|-------------------|-----------|
| C(1)-Pd-C(26)     | 132.3(5)  |
| C(1)-Pd-C(25)     | 98.3(3)   |
| C(26)-Pd-C(25)    | 37.5(4)   |
| C(1)-Pd-C(27)     | 163.7(4)  |
| C(26)-Pd-C(27)    | 34.8(4)   |
| C(25)-Pd-C(27)    | 66.0(4)   |
| C(1)-Pd-I(1)      | 99.52(13) |
| C(26)-Pd-I(1)     | 126.5(5)  |
| C(25)-Pd-I(1)     | 161.9(3)  |
| C(27)-Pd-I(1)     | 95.9(3)   |
| C(1)-N(1)-C(2)    | 111.1(4)  |
| C(1)-N(1)-C(20)   | 125.1(5)  |
| C(2)-N(1)-C(20)   | 123.8(5)  |
| C(1)-N(2)-C(7)    | 110.7(4)  |
| C(1)-N(2)-C(8)    | 128.4(4)  |
| C(7)-N(2)-C(8)    | 120.1(4)  |
| C(23)-N(3)-C(15)  | 125.3(5)  |
| C(23)-N(3)-H(3A)  | 118(4)    |
| C(15)-N(3)-H(3A)  | 115(4)    |
| C(12)-O(1)-C(21)  | 119.3(5)  |
| C(19)-O(2)-C(22)  | 119.4(4)  |
| N(2)-C(1)-N(1)    | 105.3(4)  |
| N(2)-C(1)-Pd      | 128.8(4)  |
| N(1)-C(1)-Pd      | 125.6(4)  |
| N(1)-C(2)-C(7)    | 106.9(5)  |
| N(1)-C(2)-C(3)    | 131.6(5)  |
| C(7)-C(2)-C(3)    | 121.5(6)  |
| C(4)-C(3)-C(2)    | 116.6(6)  |
| C(4)-C(3)-H(3)    | 121.7     |
| C(2)-C(3)-H(3)    | 121.7     |
| C(3)-C(4)-C(5)    | 121.7(6)  |
| C(3)-C(4)-H(4)    | 119.2     |
| C(5)-C(4)-H(4)    | 119.1     |
| C(6)-C(5)-C(4)    | 122.0(6)  |
| C(6)-C(5)-H(5)    | 119.0     |
| C(4)-C(5)-H(5)    | 119.0     |
| C(5)-C(6)-C(7)    | 116.4(6)  |
| C(5)-C(6)-H(6)    | 121.8     |
| C(7)-C(6)-H(6)    | 121.8     |
| C(2)-C(7)-N(2)    | 106.0(5)  |
| C(2)-C(7)-C(6)    | 121.7(5)  |
| N(2)-C(7)-C(6)    | 132.2(5)  |
| C(9)-C(8)-C(13)   | 121.2(5)  |
| C(9)-C(8)-N(2)    | 116.1(5)  |
| C(13)-C(8)-N(2)   | 122.7(4)  |
| C(10)-C(9)-C(8)   | 119.6(6)  |
| C(10)-C(9)-H(9)   | 120.2     |
| C(8)-C(9)-H(9)    | 120.2     |
| C(11)-C(10)-C(9)  | 121.3(6)  |
| C(11)-C(10)-H(10) | 119.4     |
| C(9)-C(10)-H(10)  | 119.4     |
| C(10)-C(11)-C(12) | 119.5(6)  |
| C(10)-C(11)-H(11) | 120.2     |
| C(12)-C(11)-H(11) | 120.2     |
| O(1)-C(12)-C(11)  | 124.1(5)  |
| O(1)-C(12)-C(13)  | 114.9(5)  |
| C(11)-C(12)-C(13) | 121.0(6)  |
| C(12)-C(13)-C(8)  | 117.4(5)  |
| C(12)-C(13)-C(14) | 119.3(5)  |
| C(8)-C(13)-C(14)  | 123.2(4)  |
| C(19)-C(14)-C(15) | 119.1(5)  |
| C(19)-C(14)-C(13) | 120.6(5)  |
| C(15)-C(14)-C(13) | 120.2(4)  |
| C(14)-C(15)-C(16) | 120.8(5)  |
| C(14)-C(15)-N(3)  | 119.8(4)  |
| C(16)-C(15)-N(3)  | 119.3(5)  |
| C(17)-C(16)-C(15) | 118.3(6)  |
| C(17)-C(16)-H(16) | 120.9     |
| C(15)-C(16)-H(16) | 120.9     |
| C(18)-C(17)-C(16) | 122.7(5)  |
| C(18)-C(17)-H(17) | 118.7     |

---

|                     |           |
|---------------------|-----------|
| C(16)-C(17)-H(17)   | 118.7     |
| C(17)-C(18)-C(19)   | 118.3(5)  |
| C(17)-C(18)-H(18)   | 120.8     |
| C(19)-C(18)-H(18)   | 120.8     |
| O(2)-C(19)-C(14)    | 115.4(5)  |
| O(2)-C(19)-C(18)    | 123.8(5)  |
| C(14)-C(19)-C(18)   | 120.8(5)  |
| N(1)-C(20)-H(20A)   | 109.5     |
| N(1)-C(20)-H(20B)   | 109.5     |
| H(20A)-C(20)-H(20B) | 109.5     |
| N(1)-C(20)-H(20C)   | 109.5     |
| H(20A)-C(20)-H(20C) | 109.5     |
| H(20B)-C(20)-H(20C) | 109.5     |
| O(1)-C(21)-H(21A)   | 109.5     |
| O(1)-C(21)-H(21B)   | 109.5     |
| H(21A)-C(21)-H(21B) | 109.5     |
| O(1)-C(21)-H(21C)   | 109.5     |
| H(21A)-C(21)-H(21C) | 109.5     |
| H(21B)-C(21)-H(21C) | 109.5     |
| O(2)-C(22)-H(22A)   | 109.5     |
| O(2)-C(22)-H(22B)   | 109.5     |
| H(22A)-C(22)-H(22B) | 109.5     |
| O(2)-C(22)-H(22C)   | 109.5     |
| H(22A)-C(22)-H(22C) | 109.5     |
| H(22B)-C(22)-H(22C) | 109.5     |
| O(3)-C(23)-N(3)     | 123.3(6)  |
| O(3)-C(23)-C(24)    | 123.0(6)  |
| N(3)-C(23)-C(24)    | 113.7(6)  |
| C(23)-C(24)-H(24A)  | 109.5     |
| C(23)-C(24)-H(24B)  | 109.5     |
| H(24A)-C(24)-H(24B) | 109.5     |
| C(23)-C(24)-H(24C)  | 109.5     |
| H(24A)-C(24)-H(24C) | 109.5     |
| H(24B)-C(24)-H(24C) | 109.5     |
| C(26)-C(25)-Pd      | 70.2(5)   |
| C(26)-C(25)-H(25A)  | 120.0     |
| Pd-C(25)-H(25A)     | 73.2      |
| C(26)-C(25)-H(25B)  | 120.0     |
| Pd-C(25)-H(25B)     | 128.9     |
| H(25A)-C(25)-H(25B) | 120.0     |
| C(27)-C(26)-C(25)   | 124.4(12) |
| C(27)-C(26)-Pd      | 74.3(6)   |
| C(25)-C(26)-Pd      | 72.3(5)   |
| C(27)-C(26)-H(26)   | 117.8     |
| C(25)-C(26)-H(26)   | 117.8     |
| Pd-C(26)-H(26)      | 128.0     |
| C(26)-C(27)-Pd      | 70.9(6)   |
| C(26)-C(27)-H(27A)  | 120.0     |
| Pd-C(27)-H(27A)     | 72.1      |
| C(26)-C(27)-H(27B)  | 120.0     |
| Pd-C(27)-H(27B)     | 129.4     |
| H(27A)-C(27)-H(27B) | 120.0     |

---

Symmetry transformations used to generate equivalent atoms:

Table 4. Anisotropic displacement parameters ( $\text{Å}^2 \times 10^3$ ) for cd29547.  
 The anisotropic displacement factor exponent takes the form:  
 $-2 \pi^2 [ h^2 a^{*2} U_{11} + \dots + 2 h k a^* b^* U_{12} ]$

|       | U11     | U22     | U33    | U23    | U13    | U12    |
|-------|---------|---------|--------|--------|--------|--------|
| Pd    | 81(1)   | 44(1)   | 51(1)  | -4(1)  | -2(1)  | -1(1)  |
| I(1)  | 78(1)   | 50(1)   | 152(1) | 10(1)  | -40(1) | -18(1) |
| N(1)  | 48(3)   | 44(2)   | 60(3)  | -4(2)  | 8(2)   | -3(2)  |
| N(2)  | 38(2)   | 46(2)   | 53(3)  | 9(2)   | 9(2)   | -2(2)  |
| N(3)  | 62(3)   | 42(3)   | 60(3)  | 5(2)   | -1(2)  | -2(2)  |
| O(1)  | 51(2)   | 90(3)   | 94(3)  | -6(3)  | 22(2)  | 19(2)  |
| O(2)  | 40(2)   | 74(3)   | 62(3)  | -7(2)  | 10(2)  | -9(2)  |
| O(3)  | 84(3)   | 74(3)   | 159(5) | 39(3)  | -1(3)  | 13(3)  |
| C(1)  | 46(3)   | 41(3)   | 52(3)  | 2(2)   | 7(3)   | -13(2) |
| C(2)  | 43(3)   | 42(3)   | 60(4)  | 3(3)   | 4(3)   | -9(2)  |
| C(3)  | 51(4)   | 59(4)   | 81(5)  | 0(3)   | 5(3)   | 4(3)   |
| C(4)  | 61(4)   | 83(5)   | 84(6)  | 18(4)  | -19(4) | -6(3)  |
| C(5)  | 84(5)   | 89(5)   | 46(4)  | 12(3)  | -4(3)  | -16(4) |
| C(6)  | 64(4)   | 75(4)   | 51(4)  | 3(3)   | 12(3)  | -1(3)  |
| C(7)  | 43(3)   | 53(3)   | 53(4)  | 8(3)   | 3(3)   | -7(2)  |
| C(8)  | 39(3)   | 62(3)   | 57(4)  | 14(3)  | 9(3)   | -10(2) |
| C(9)  | 50(4)   | 96(5)   | 79(5)  | 31(4)  | 11(3)  | -14(3) |
| C(10) | 58(4)   | 141(7)  | 88(6)  | 41(5)  | 18(4)  | -27(4) |
| C(11) | 39(3)   | 133(7)  | 86(5)  | 13(5)  | 24(3)  | -2(4)  |
| C(12) | 33(3)   | 90(5)   | 67(4)  | 0(3)   | 9(3)   | -3(3)  |
| C(13) | 37(3)   | 65(4)   | 47(3)  | -2(3)  | 11(2)  | -9(2)  |
| C(14) | 39(3)   | 42(3)   | 59(4)  | 0(2)   | 18(3)  | 3(2)   |
| C(15) | 52(3)   | 37(3)   | 60(4)  | 2(2)   | 15(3)  | 2(2)   |
| C(16) | 77(4)   | 47(3)   | 61(4)  | 9(3)   | 18(3)  | 0(3)   |
| C(17) | 75(4)   | 50(3)   | 95(6)  | 9(3)   | 40(4)  | -5(3)  |
| C(18) | 57(4)   | 47(3)   | 88(5)  | -2(3)  | 27(4)  | -5(3)  |
| C(19) | 44(3)   | 48(3)   | 60(4)  | -7(3)  | 17(3)  | 5(2)   |
| C(20) | 79(4)   | 66(4)   | 76(5)  | -8(3)  | 15(4)  | 3(3)   |
| C(21) | 65(5)   | 130(7)  | 165(9) | -20(6) | 30(5)  | 35(4)  |
| C(22) | 51(4)   | 130(6)  | 97(6)  | 6(5)   | -2(4)  | -24(4) |
| C(23) | 68(4)   | 70(4)   | 78(5)  | 13(4)  | 3(3)   | -1(4)  |
| C(24) | 72(5)   | 100(6)  | 105(6) | 17(4)  | -12(4) | -7(4)  |
| C(25) | 119(7)  | 110(6)  | 92(7)  | 20(5)  | 75(6)  | 10(5)  |
| C(26) | 258(16) | 154(10) | 84(8)  | 41(7)  | 91(10) | 49(11) |
| C(27) | 189(11) | 203(11) | 57(6)  | 42(6)  | 47(7)  | 105(9) |



Table 5. Hydrogen coordinates ( $\times 10^4$ ) and isotropic displacement parameters ( $\text{Å}^2 \times 10^3$ ) for cd29547.

|        | x        | y       | z        | U(eq)  |
|--------|----------|---------|----------|--------|
| H(3)   | -3743    | 2553    | 5930     | 78     |
| H(4)   | -3933    | 2248    | 4572     | 96     |
| H(5)   | -2267    | 1522    | 4115     | 91     |
| H(6)   | -273     | 1138    | 4974     | 76     |
| H(9)   | 1876     | 2178    | 5928     | 90     |
| H(10)  | 3976     | 1777    | 5670     | 114    |
| H(11)  | 4905     | 590     | 6132     | 101    |
| H(16)  | 1719     | -933    | 9094     | 73     |
| H(17)  | -354     | -1484   | 8505     | 84     |
| H(18)  | -1417    | -1159   | 7218     | 75     |
| H(20A) | -2543    | 3004    | 7376     | 111    |
| H(20B) | -1687    | 2571    | 8127     | 111    |
| H(20C) | -3035    | 2182    | 7650     | 111    |
| H(21A) | 5152     | -766    | 6300     | 179    |
| H(21B) | 5278     | -1264   | 7094     | 179    |
| H(21C) | 5791     | -383    | 7132     | 179    |
| H(22A) | -1846    | -1000   | 5880     | 142    |
| H(22B) | -1949    | -268    | 5299     | 142    |
| H(22C) | -2411    | -190    | 6136     | 142    |
| H(24A) | 6444     | -100    | 9053     | 144    |
| H(24B) | 5621     | 449     | 9545     | 144    |
| H(24C) | 5600     | 620     | 8629     | 144    |
| H(25A) | -423     | 648     | 8607     | 120    |
| H(25B) | -1731    | 1085    | 8856     | 120    |
| H(26)  | -333     | 1690    | 9907     | 189    |
| H(27A) | 1808     | 922     | 9435     | 176    |
| H(27B) | 1894     | 1519    | 10188    | 176    |
| H(3A)  | 3280(50) | 560(13) | 8390(30) | 55(16) |

Table 6. Torsion angles [deg] for cd29547.

|                         |            |
|-------------------------|------------|
| C(7)-N(2)-C(1)-N(1)     | -1.0(5)    |
| C(8)-N(2)-C(1)-N(1)     | 168.3(4)   |
| C(7)-N(2)-C(1)-Pd       | 173.4(3)   |
| C(8)-N(2)-C(1)-Pd       | -17.3(7)   |
| C(2)-N(1)-C(1)-N(2)     | 0.7(5)     |
| C(20)-N(1)-C(1)-N(2)    | -177.9(4)  |
| C(2)-N(1)-C(1)-Pd       | -174.0(3)  |
| C(20)-N(1)-C(1)-Pd      | 7.4(7)     |
| C(26)-Pd-C(1)-N(2)      | -135.6(6)  |
| C(25)-Pd-C(1)-N(2)      | -117.8(4)  |
| C(27)-Pd-C(1)-N(2)      | -103.1(10) |
| I(1)-Pd-C(1)-N(2)       | 58.7(4)    |
| C(26)-Pd-C(1)-N(1)      | 37.8(6)    |
| C(25)-Pd-C(1)-N(1)      | 55.6(4)    |
| C(27)-Pd-C(1)-N(1)      | 70.3(11)   |
| I(1)-Pd-C(1)-N(1)       | -127.9(4)  |
| C(1)-N(1)-C(2)-C(7)     | 0.0(5)     |
| C(20)-N(1)-C(2)-C(7)    | 178.6(5)   |
| C(1)-N(1)-C(2)-C(3)     | -179.2(5)  |
| C(20)-N(1)-C(2)-C(3)    | -0.5(8)    |
| N(1)-C(2)-C(3)-C(4)     | -179.0(5)  |
| C(7)-C(2)-C(3)-C(4)     | 2.0(8)     |
| C(2)-C(3)-C(4)-C(5)     | 0.9(9)     |
| C(3)-C(4)-C(5)-C(6)     | -2.3(10)   |
| C(4)-C(5)-C(6)-C(7)     | 0.7(9)     |
| N(1)-C(2)-C(7)-N(2)     | -0.6(5)    |
| C(3)-C(2)-C(7)-N(2)     | 178.6(4)   |
| N(1)-C(2)-C(7)-C(6)     | 177.1(5)   |
| C(3)-C(2)-C(7)-C(6)     | -3.7(8)    |
| C(1)-N(2)-C(7)-C(2)     | 1.1(5)     |
| C(8)-N(2)-C(7)-C(2)     | -169.3(4)  |
| C(1)-N(2)-C(7)-C(6)     | -176.3(5)  |
| C(8)-N(2)-C(7)-C(6)     | 13.4(8)    |
| C(5)-C(6)-C(7)-C(2)     | 2.2(8)     |
| C(5)-C(6)-C(7)-N(2)     | 179.2(5)   |
| C(1)-N(2)-C(8)-C(9)     | -108.1(6)  |
| C(7)-N(2)-C(8)-C(9)     | 60.4(6)    |
| C(1)-N(2)-C(8)-C(13)    | 73.1(7)    |
| C(7)-N(2)-C(8)-C(13)    | -118.5(5)  |
| C(13)-C(8)-C(9)-C(10)   | 1.2(9)     |
| N(2)-C(8)-C(9)-C(10)    | -177.6(6)  |
| C(8)-C(9)-C(10)-C(11)   | -0.4(11)   |
| C(9)-C(10)-C(11)-C(12)  | 0.3(12)    |
| C(21)-O(1)-C(12)-C(11)  | 5.7(9)     |
| C(21)-O(1)-C(12)-C(13)  | -175.3(6)  |
| C(10)-C(11)-C(12)-O(1)  | 177.9(6)   |
| C(10)-C(11)-C(12)-C(13) | -1.1(10)   |
| O(1)-C(12)-C(13)-C(8)   | -177.2(5)  |
| C(11)-C(12)-C(13)-C(8)  | 1.8(8)     |
| O(1)-C(12)-C(13)-C(14)  | 2.1(8)     |
| C(11)-C(12)-C(13)-C(14) | -178.9(6)  |
| C(9)-C(8)-C(13)-C(12)   | -1.9(8)    |
| N(2)-C(8)-C(13)-C(12)   | 176.8(5)   |
| C(9)-C(8)-C(13)-C(14)   | 178.8(5)   |
| N(2)-C(8)-C(13)-C(14)   | -2.4(8)    |
| C(12)-C(13)-C(14)-C(19) | -115.1(6)  |
| C(8)-C(13)-C(14)-C(19)  | 64.1(7)    |
| C(12)-C(13)-C(14)-C(15) | 61.2(7)    |
| C(8)-C(13)-C(14)-C(15)  | -119.5(6)  |
| C(19)-C(14)-C(15)-C(16) | -0.9(7)    |
| C(13)-C(14)-C(15)-C(16) | -177.4(4)  |
| C(19)-C(14)-C(15)-N(3)  | -178.7(4)  |
| C(13)-C(14)-C(15)-N(3)  | 4.8(7)     |
| C(23)-N(3)-C(15)-C(14)  | -124.9(6)  |
| C(23)-N(3)-C(15)-C(16)  | 57.3(7)    |
| C(14)-C(15)-C(16)-C(17) | 0.7(7)     |
| N(3)-C(15)-C(16)-C(17)  | 178.5(5)   |
| C(15)-C(16)-C(17)-C(18) | -0.8(8)    |

---

|                         |            |
|-------------------------|------------|
| C(16)-C(17)-C(18)-C(19) | 1.1(8)     |
| C(22)-O(2)-C(19)-C(14)  | -171.3(5)  |
| C(22)-O(2)-C(19)-C(18)  | 10.3(7)    |
| C(15)-C(14)-C(19)-O(2)  | -177.2(4)  |
| C(13)-C(14)-C(19)-O(2)  | -0.7(6)    |
| C(15)-C(14)-C(19)-C(18) | 1.3(7)     |
| C(13)-C(14)-C(19)-C(18) | 177.7(4)   |
| C(17)-C(18)-C(19)-O(2)  | 176.9(5)   |
| C(17)-C(18)-C(19)-C(14) | -1.4(8)    |
| C(15)-N(3)-C(23)-O(3)   | -7.2(10)   |
| C(15)-N(3)-C(23)-C(24)  | 171.0(5)   |
| C(1)-Pd-C(25)-C(26)     | -158.2(7)  |
| C(27)-Pd-C(25)-C(26)    | 26.2(7)    |
| I(1)-Pd-C(25)-C(26)     | 33.1(11)   |
| Pd-C(25)-C(26)-C(27)    | -55.7(10)  |
| C(1)-Pd-C(26)-C(27)     | 164.7(7)   |
| C(25)-Pd-C(26)-C(27)    | 134.9(12)  |
| I(1)-Pd-C(26)-C(27)     | -32.9(10)  |
| C(1)-Pd-C(26)-C(25)     | 29.8(8)    |
| C(27)-Pd-C(26)-C(25)    | -134.9(12) |
| I(1)-Pd-C(26)-C(25)     | -167.8(4)  |
| C(25)-C(26)-C(27)-Pd    | 54.8(10)   |
| C(1)-Pd-C(27)-C(26)     | -44.1(15)  |
| C(25)-Pd-C(27)-C(26)    | -28.2(8)   |
| I(1)-Pd-C(27)-C(26)     | 154.0(8)   |

---

Symmetry transformations used to generate equivalent atoms:

Table 7. Hydrogen bonds for cd29547 [Å and deg.].

| D-H...A               | d(D-H)    | d(H...A) | d(D...A) | <(DHA) |
|-----------------------|-----------|----------|----------|--------|
| C(3)-H(3)...O(3)#1    | 0.93      | 2.52     | 3.278(7) | 138.8  |
| C(21)-H(21B)...I(1)#2 | 0.96      | 3.07     | 3.780(7) | 131.8  |
| N(3)-H(3A)...I(1)     | 0.819(19) | 2.92(2)  | 3.725(5) | 167(4) |

Symmetry transformations used to generate equivalent atoms:

#1 -x,y+1/2,-z+3/2    #2 -x+1,y-1/2,-z+3/2
