# Supplementary material for: Synthesis of chiral mono(N-heterocyclic carbene) palladium and gold complexes with a 1,1'-biphenyl scaffold and their applications in catalysis
Source: publisher site journal article supplement (doi:10.3762/bjoc.7.64), 2011-05-04
Supplement: Additional file 3 [file 1860-5397-7-64-S3.pdf]

# Supporting Information

for

## Synthesis of chiral mono(N-heterocyclic carbene) palladium and gold complexes with a 1,1'-biphenyl scaffold and their applications in catalysis

Lian-jun Liu<sup>1</sup>, Feijun Wang<sup>1</sup>, Wenfeng Wang<sup>1</sup>, Mei-xin Zhao<sup>1</sup> and Min Shi<sup>\*1,2</sup>

Address: <sup>1</sup>Key Laboratory for Advanced Materials and Institute of Fine Chemicals, School of Chemistry & Molecular Engineering, East China University of Science and Technology, 130 MeiLong Road, Shanghai 200237, People's Republic of China and <sup>2</sup>State Key Laboratory of Organometallic Chemistry, Shanghai Institute of Organic Chemistry, Chinese Academy of Sciences, 354 Fenglin Road, Shanghai 200032, People's Republic of China, Fax: 86-21-64166128

Email: Min Shi\* - Mshi@mail.sioc.ac.cn

\*Corresponding author

### Crystal structure data for NHC–Au(I) complex 6a

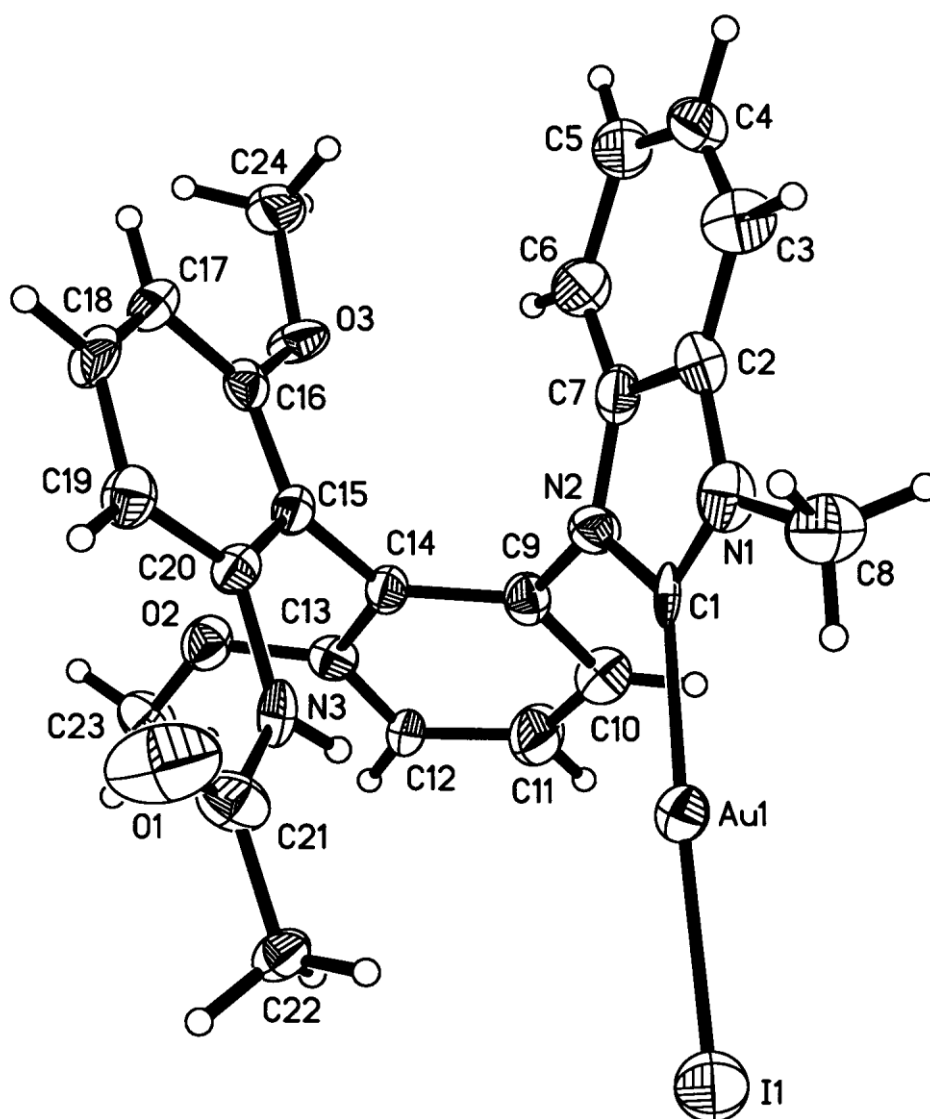

The crystal data of **6a** have been deposited in CCDC with number 782844. Empirical Formula:  $C_{24}H_{23}AuIN_3O_3$ ; Formula Weight: 725.32; Crystal Color, Habit: colorless, prismatic; Crystal Dimensions: 0.277 x 0.268 x 0.224 mm; Crystal System: Monoclinic; Lattice Type: Primitive; Lattice Parameters:  $a = 9.2786(7)\text{\AA}$ ,  $b = 25.5371(19)\text{\AA}$ ,  $c = 10.1633(7)\text{\AA}$ ,  $\alpha = 90^\circ$ ,  $\beta = 104.9480(10)^\circ$ ,  $\gamma = 90^\circ$ ,  $V = 2326.7(3)\text{\AA}^3$ ; Space group: P2(1);  $Z = 4$ ;  $D_{calc} = 2.071\text{ g/cm}^3$ ;  $F_{000} = 1376$ ; Diffractometer: Rigaku AFC7R; Residuals: R;  $R_w = 0.0478, 0.1273$ .
